# Supplementary material
Source: Research Square preprint supplement (doi:10.21203/rs.3.rs-9003758/v1)
Supplement: Supplementary file 1 [file 3373d6fa1ce8f301f43a4047.docx]

***Table 3.* Implant Characteristics**

| **Nail Types** | **N** | **%** |
| --- | --- | --- |
| INTERTAN | 48 | 67.6 |
| PFN-A | 10 | 14.1 |
| PROFIN | 2 | 2.8 |
| TALON | 11 | 15.5 |
| **Total** | **71** | **100** |
| **Nail Brands** | **N** | **%** |
| SMITH | 47 | 66.2 |
| GMD | 10 | 14.1 |
| ZIMED | 11 | 15.5 |
| TRAUHUI | 2 | 2.8 |
| LTE | 1 | 1.4 |
| **Total** | **71** | **100** |
| **Nail Angle** | **N** | **%** |
| 125° | 26 | 36.6 |
| 130° | 45 | 63.4 |
| **Total** | **71** | **100** |
| **Nail Diameters (mm)** | **N** | **%** |
| 10 | 13 | 18.3 |
| 11 | 10 | 14.1 |
| 11.5 | 33 | 46.5 |
| 12 | 10 | 14.1 |
| 13 | 1 | 1.4 |
| 14 | 2 | 2.8 |
| **Total** | **71** | **100** |
| **Nail sizes (mm)** | **N** | **%** |
| 170 | 4 | 5.6 |
| 200 | 54 | 76.1 |
| 215 | 8 | 11.3 |
| 240 | 2 | 2.8 |
| **Total** | **71** | **100** |
